# Supplementary material for: Community engagement and local governance for health equity through trust: lessons from developing the CONNECT Initiative in the Lao People’s Democratic Republic
Source: PubMed Central journal article supplement (PMC11440194; doi:10.1136/bmjgh-2024-015409), 2024-09-28
Supplement: bmjgh-9-9-s001.pdf [file bmjgh-9-9-s001.pdf]

*Supplementary Table 1: Selected Indicators of CONNECT Initiative*

| Domain                                  | Indicators                                               | Data collection method |
|-----------------------------------------|----------------------------------------------------------|------------------------|
| 1 Health equity and wellbeing for all   | Equity ratio of child mortalities and nutrition status   | LSIS                   |
| 2.1 Social Determinants of Health (SDH) | Equity in SES, literacy, pro-equity policies and actions | LECS                   |
| 2.2 Healthy behaviour and environment   | Breastfeeding, open defecation, latrine use              | LSIS                   |
| 2.3 Equity in service coverage          | Equity ratio of coverages on ANC, SBA, PNC, vaccination  | LSIS                   |
| 2.4 Equity in healthcare quality        | Experience of care by SES, ethnicity, level of education | QAIS                   |
| 3.1 Strengthened health governance      | Existence, knowledge, implementation of policies         | Documents / interviews |

|                                         |                                                           |                       |
|-----------------------------------------|-----------------------------------------------------------|-----------------------|
| 3.2 Local social determinants of health | Pro-equity policies and actions beyond health sector      | District report       |
| 3.3 Enhanced community engagement       | Level of engagement and ownership                         | Village census        |
| 3.4 Improved trust and relationships    | Improved trust score, examples of improved trust          | Village census        |
| 3.5 Increased service utilization       | Utilization of ANC, SBA, vaccination                      | Village registry      |
| 3.6 Improved healthcare service quality | Health provider's self reported score for respectful care | Providers' interviews |
| Process and input                       | Number of villages receiving interventions, expenditure   | Activity report       |
